# Supplementary material for: Data Synthesis Technique for Categorical Pestes Des Petits Ruminants (PPR) Data Using CTGAN Model
Source: Preprints.org preprint supplement (doi:10.20944/preprints202305.0777.v1), 2023-05-11
Supplement: Supplementary file 1 [file supplementary]

temp	nasal_discharge	diarrhea	difficult_breathing	age	eye_discharge	oral_nasal_lesion	animal	sex	result
1	0	0	1	0	0	1	1	0	0
1	1	1	1	0	1	1	1	1	1
1	1	1	1	0	0	1	1	0	1
0	0	0	0	0	0	0	0	0	0
1	1	0	0	1	0	1	1	0	1
1	1	0	1	1	1	0	1	1	1
1	0	1	0	0	1	0	0	1	1
1	1	1	1	0	1	0	0	1	1
1	1	0	0	1	1	0	0	1	1
1	0	0	0	1	1	0	1	1	1
1	1	1	1	0	0	1	0	0	1
1	0	0	1	1	1	0	0	0	0
1	0	1	1	1	1	0	1	1	0
1	0	0	1	1	1	0	1	1	0
0	0	0	0	0	0	0	0	0	0
1	1	1	1	0	1	0	1	1	1
1	1	1	1	0	1	1	1	0	1
1	0	0	1	1	0	1	1	0	1
1	1	0	0	0	1	0	0	1	1
1	0	1	0	0	1	1	1	0	1
0	0	0	0	0	0	0	0	1	0
1	0	0	0	1	0	0	1	0	0
1	1	0	1	0	1	0	1	1	1
1	0	0	1	1	0	1	1	0	1
0	0	0	0	0	0	0	0	0	0
1	1	0	1	1	1	0	1	1	1
1	1	0	1	0	1	1	1	0	1
1	0	0	1	0	0	0	1	1	0
0	0	1	1	0	1	0	1	0	0
1	1	1	1	0	1	0	1	0	1
1	1	0	1	1	1	0	1	1	1
1	1	1	1	0	1	1	0	0	1
1	0	0	0	1	0	1	1	0	0
1	1	0	0	1	1	0	1	1	1
0	1	1	0	0	1	0	1	0	1
1	1	0	1	0	1	1	1	1	1
1	1	1	1	0	0	0	1	0	0
1	0	0	1	1	0	1	1	0	1
1	0	0	0	1	1	0	1	1	1
1	1	0	0	0	1	0	1	1	1
1	1	0	0	1	1	0	1	1	1
0	0	0	0	0	0	0	0	0	0
1	1	1	1	0	1	0	0	0	0
1	1	1	1	0	1	0	0	1	1
1	1	0	1	0	0	0	1	0	1
1	0	0	0	1	0	0	1	1	1
1	1	1	0	0	0	1	0	0	0
1	1	1	1	1	0	1	1	0	1
0	1	0	0	0	0	0	0	0	1
1	0	0	0	1	1	0	1	1	1
1	0	0	0	1	1	0	1	0	0
1	1	0	1	1	1	1	1	1	1
1	1	0	0	1	1	0	1	1	1
1	0	0	0	1	0	0	1	0	0
1	0	0	0	1	0	1	1	0	0
1	1	1	1	0	1	1	1	0	0
1	0	1	0	0	0	0	0	0	1
1	1	1	0	0	1	1	0	0	1
1	1	1	1	0	1	1	0	0	1
1	1	1	1	1	1	1	1	1	1
1	1	1	1	1	0	1	1	1	1
1	1	0	1	1	1	0	1	1	0
1	0	1	1	1	0	1	1	0	1
1	1	1	1	0	1	0	1	1	1
0	0	1	0	0	0	0	0	0	0
1	1	0	1	1	0	0	1	0	0
1	1	1	1	0	0	1	1	0	1
1	1	1	1	0	1	1	1	0	1
0	0	0	0	0	0	0	0	0	0
1	1	1	0	0	1	0	0	0	1
1	1	0	0	1	1	0	0	0	1
1	1	1	0	0	1	0	0	0	1
1	0	0	0	1	1	0	0	0	1
0	1	0	0	0	0	0	0	0	1
0	0	0	0	0	0	0	1	1	0
0	1	0	0	0	1	0	0	0	1
1	1	1	1	0	1	1	1	1	1
1	0	1	1	1	0	1	1	0	1
1	1	1	1	0	1	1	0	0	1
1	1	0	0	1	1	0	0	0	1
0	0	0	0	0	0	0	1	0	0
0	0	0	0	1	0	0	0	0	0
1	0	0	0	1	0	1	0	0	1
0	1	0	0	0	0	0	0	0	0
1	1	1	1	0	0	1	1	0	1
1	1	0	0	0	0	0	1	1	1
1	0	0	1	1	0	0	1	0	0
1	0	1	1	0	0	0	1	1	0
1	1	0	0	1	1	0	0	1	1
1	1	1	1	0	1	1	1	1	1
1	1	1	1	0	1	0	0	0	1
1	1	0	0	1	0	0	1	0	1
1	1	1	0	0	1	1	1	0	1
0	1	1	0	0	0	0	0	0	1
0	0	0	0	0	0	0	0	0	0
1	1	0	0	0	1	0	1	1	1
1	1	1	1	0	0	1	1	0	1
0	1	1	0	0	0	0	0	0	1
1	0	0	0	1	1	0	1	1	0
0	0	1	1	0	1	0	1	0	0
1	1	1	1	0	0	1	0	0	1
1	0	0	1	1	0	0	1	0	0
1	1	0	0	1	1	0	1	1	1
1	0	1	1	1	1	0	0	0	0
1	1	0	0	1	0	0	1	1	1
1	1	1	1	0	0	0	1	1	1
1	1	0	0	1	1	0	1	1	1
1	0	0	0	1	0	1	1	0	1
1	0	0	1	1	1	0	1	1	1
0	0	0	0	0	0	0	0	0	0
1	1	0	0	1	1	0	0	1	1
1	1	1	1	1	1	1	1	1	1
1	0	0	1	1	0	0	1	0	0
1	1	0	0	1	1	0	1	1	1
1	1	0	0	1	0	1	1	0	1
1	0	0	0	1	0	0	1	1	1
1	1	0	0	1	1	0	0	1	1
1	1	0	0	1	1	0	1	0	1
1	0	0	0	1	0	0	0	1	0
1	1	1	1	0	1	1	1	1	1
0	1	1	0	0	1	0	0	0	0
1	0	0	0	0	0	1	1	0	0
1	1	1	1	0	1	0	1	0	1
1	1	0	0	0	1	0	0	1	1
1	1	0	0	1	1	0	1	1	1
0	0	0	0	0	0	0	0	0	0
0	0	0	0	0	0	1	0	0	0
1	1	1	1	0	1	0	0	1	1
1	1	1	1	1	1	0	1	1	1
0	0	0	0	0	0	0	0	0	0
0	0	0	0	0	0	0	0	0	0
0	1	0	0	0	1	0	0	0	1
1	1	0	0	1	0	0	1	1	1
1	1	0	0	0	0	1	1	1	1
1	1	1	1	1	1	1	0	0	1
1	0	0	1	0	1	0	1	1	0
1	1	0	0	0	1	0	1	1	0
0	0	0	0	0	0	0	0	0	1
1	1	0	0	0	1	0	1	1	1
1	0	0	0	1	1	0	1	1	0
1	0	0	0	1	0	0	1	1	1
0	0	0	0	0	0	0	0	0	0
1	1	1	1	0	1	0	1	1	1
1	0	0	0	1	0	1	1	0	0
1	1	0	0	1	1	0	1	1	1
1	1	0	1	1	1	0	1	1	0
1	1	0	1	1	1	1	1	1	1
1	1	1	1	1	1	1	1	0	1
1	1	0	0	0	1	0	0	1	0
1	1	0	0	1	0	1	0	0	1
0	0	0	0	0	0	0	1	0	0
1	1	1	1	1	1	1	1	1	1
1	1	1	1	1	0	1	0	0	1
1	0	1	0	0	0	0	0	1	1
1	1	0	1	0	1	0	0	0	1
0	1	1	1	0	1	0	0	1	0
1	1	1	1	0	0	1	1	1	1
1	1	1	1	1	1	1	1	0	1
0	1	0	0	0	0	0	1	1	1
0	0	0	0	0	1	0	0	0	1
0	1	1	1	0	1	0	1	0	1
1	1	0	0	1	0	0	1	0	1
1	1	1	1	0	0	1	1	1	1
1	1	1	1	0	0	1	1	1	1
0	0	0	0	0	0	0	0	0	0
1	1	0	0	1	1	0	1	1	1
1	1	0	0	1	1	0	1	1	1
1	0	0	0	1	0	0	1	0	0
1	0	1	1	0	0	1	1	0	1
1	1	1	1	0	1	1	1	1	1
1	1	0	0	1	0	0	0	0	1
1	1	1	0	1	0	1	1	0	1
1	1	0	0	1	1	0	1	1	0
1	1	1	1	1	1	0	1	0	1
1	1	1	0	1	1	0	1	1	1
0	0	0	0	0	0	0	0	0	0
1	1	1	0	0	1	0	0	0	1
1	0	0	1	0	0	1	1	0	1
1	1	1	1	0	0	1	0	0	1
1	1	0	0	1	1	0	1	1	1
1	0	0	0	1	0	1	1	0	1
1	0	0	1	1	1	0	1	0	1
1	1	1	1	1	1	1	1	1	1
1	1	0	0	0	1	1	1	1	1
1	1	1	1	0	1	0	1	1	0
1	1	1	1	0	0	0	1	0	0
1	1	1	1	0	1	0	0	0	0
1	0	1	0	1	0	0	0	0	0
1	1	1	1	0	0	1	1	0	1
1	1	0	1	1	1	0	1	1	0
1	0	1	0	0	1	1	0	0	1
1	1	1	1	0	1	0	1	1	1
1	1	0	0	1	1	0	1	1	1
1	1	1	1	0	1	1	1	0	1
1	1	1	1	0	1	0	0	0	1
1	1	0	0	0	1	0	0	1	1
1	1	1	1	0	0	1	0	0	1
0	0	0	0	1	0	0	1	0	0
1	0	0	1	1	0	1	1	0	1
1	0	1	1	0	1	1	1	0	0
1	0	0	0	0	1	0	1	0	0
0	0	1	0	0	0	0	0	0	0
1	0	0	0	1	0	0	1	0	0
1	1	1	0	0	1	0	0	1	1
1	1	0	0	1	0	1	1	0	1
1	1	0	0	1	0	1	1	1	1
0	0	0	0	0	0	0	0	0	0
1	1	1	1	0	1	0	1	1	1
1	1	0	0	1	1	0	1	1	1
1	1	1	1	0	0	1	1	0	1
1	1	1	0	0	1	1	0	0	1
1	1	0	0	1	1	0	1	1	1
1	0	1	0	0	1	0	1	1	0
0	1	1	1	0	1	0	1	0	0
1	0	0	0	0	0	0	0	0	0
1	1	1	0	0	1	1	0	0	1
1	1	0	1	1	0	1	1	0	1
1	1	1	1	0	1	0	1	0	1
1	0	0	0	1	0	1	0	0	0
1	1	1	1	1	0	1	1	0	1
1	1	0	0	1	1	0	1	1	1
1	1	0	0	1	0	1	1	1	1
1	1	1	0	1	0	1	0	0	1
0	0	1	0	0	0	0	0	0	1
1	1	0	0	1	0	1	1	0	1
1	1	0	0	0	1	0	0	1	1
1	1	1	0	0	1	0	0	0	1
1	1	1	1	0	0	1	1	0	1
1	0	0	0	1	0	0	1	1	0
1	0	1	1	1	0	0	1	0	0
1	1	0	0	1	0	0	0	0	1
0	0	0	0	0	0	0	0	0	0
1	1	0	1	1	0	1	1	0	1
1	1	0	1	1	1	1	1	0	0
1	1	0	1	0	1	0	1	1	1
0	0	0	0	0	0	0	0	0	0
1	0	0	0	1	1	0	0	1	1
1	0	1	0	0	1	0	0	0	0
1	0	0	0	0	1	0	1	1	0
1	0	0	1	0	0	1	0	0	0
0	1	0	0	0	1	0	0	0	0
1	0	1	1	0	1	0	1	1	0
1	1	1	1	0	1	0	1	1	1
1	1	1	0	0	1	0	0	0	1
1	0	0	0	1	1	0	0	1	1
1	0	0	0	1	1	0	1	1	1
0	0	0	1	0	0	0	1	0	0
1	0	0	0	0	1	0	0	0	1
1	1	1	1	0	0	1	0	0	1
1	0	0	0	1	0	1	1	0	1
1	1	1	1	1	1	1	1	1	1
1	1	1	0	1	1	0	0	1	1
1	0	0	1	0	0	1	1	0	0
0	1	1	0	0	1	0	0	0	0
1	1	0	0	1	1	0	1	0	1
1	1	0	0	1	1	0	1	1	1
0	0	0	1	0	0	1	1	0	1
1	1	0	0	1	1	0	1	1	1
1	1	0	0	1	1	0	0	0	1
1	1	1	0	0	1	0	0	0	1
1	1	0	0	0	0	1	1	0	1
1	0	0	0	1	0	0	1	0	1
1	1	1	0	0	1	0	0	1	1
1	1	1	0	0	1	1	1	1	1
1	0	1	1	1	0	1	1	0	0
1	1	0	0	1	1	0	1	1	1
1	1	1	0	0	1	1	1	1	1
1	0	0	1	1	1	0	1	1	1
1	1	1	1	0	1	0	0	1	1
1	1	1	1	0	1	1	1	0	0
1	0	0	0	1	1	0	1	1	0
1	1	0	1	1	1	0	1	1	1
0	0	0	0	0	0	0	0	0	0
1	1	1	1	1	1	1	1	1	1
1	0	0	0	0	0	0	0	0	0
1	0	0	0	1	1	1	1	1	1
1	0	1	1	0	1	0	1	1	0
1	1	1	0	0	1	1	0	0	1
1	1	0	0	1	0	1	0	0	1
1	0	0	0	1	0	0	1	0	0
1	0	1	0	1	1	1	0	0	1
1	0	0	0	1	0	0	0	0	0
1	1	0	0	1	1	0	1	1	1
1	0	1	0	0	0	0	1	0	1
1	0	0	0	1	1	0	1	1	0
1	0	0	0	1	0	0	0	0	1
1	1	0	0	1	1	0	1	1	1
1	0	0	0	1	0	0	1	1	0
0	1	0	0	0	1	0	0	1	0
1	1	0	0	0	1	0	1	1	1
1	0	0	1	1	0	0	1	0	0
1	1	0	0	1	1	0	1	1	1
1	1	0	0	1	0	1	1	1	1
1	0	1	0	0	0	1	0	0	1
1	1	0	0	1	1	0	1	1	1
1	1	0	1	0	0	0	1	1	0
0	0	1	1	0	0	0	0	0	0
1	1	0	1	0	1	0	1	1	1
1	0	0	0	1	0	0	0	0	1
1	0	0	0	1	0	0	1	1	0
1	0	1	0	0	0	0	0	0	0
0	0	0	0	0	0	0	0	0	0
1	0	1	0	1	1	0	0	0	1
1	1	1	1	0	0	0	1	0	0
1	1	1	1	0	0	1	1	0	0
1	0	0	0	1	0	0	0	0	0
1	1	0	0	1	1	0	1	1	1
0	0	0	0	0	0	0	0	0	0
1	0	0	0	1	0	0	1	0	0
1	1	1	1	0	1	1	1	1	1
1	0	0	0	1	0	1	1	0	1
1	1	1	1	1	1	0	0	0	1
1	1	0	0	1	0	1	1	0	1
1	1	0	1	1	0	1	1	1	1
1	1	1	1	0	1	1	1	0	1
1	1	0	1	0	1	0	1	1	1
1	0	0	0	0	0	0	1	1	1
0	0	0	1	0	0	1	0	0	0
1	1	1	1	0	1	0	1	1	1
1	1	1	0	1	1	0	0	1	1
1	0	0	1	1	0	0	1	0	0
1	1	0	1	0	1	1	1	1	1
1	1	1	0	0	1	0	1	1	1
1	1	0	0	1	0	0	1	0	1
1	0	1	0	0	0	1	0	0	1
1	1	1	0	1	1	1	1	1	1
1	0	0	0	1	0	0	0	0	0
1	1	1	0	0	0	0	0	0	0
1	0	0	0	0	1	0	1	1	0
1	1	0	1	1	1	1	1	1	1
1	0	0	1	1	1	0	1	1	0
1	1	1	1	1	0	1	1	0	1
1	0	0	0	1	0	0	0	0	1
0	0	0	0	0	0	0	0	0	1
1	1	0	0	1	0	1	1	1	1
1	1	0	0	1	0	0	1	0	1
1	1	1	0	1	1	1	1	1	1
1	1	0	0	1	0	0	1	1	1
1	1	0	0	0	1	0	0	1	1
0	0	0	0	0	0	0	0	1	0
1	1	0	1	1	1	1	1	1	1
1	1	1	1	0	1	1	1	1	1
1	0	1	0	0	0	0	0	0	0
1	0	1	1	1	0	0	1	0	0
1	0	0	1	1	0	0	1	0	0
1	1	0	0	1	0	1	1	0	1
1	1	1	1	0	1	0	1	1	1
1	1	1	0	0	1	0	0	1	1
0	1	0	0	0	0	0	0	0	0
1	1	0	0	1	1	0	1	1	1
1	1	0	0	1	1	1	1	1	0
1	0	0	0	1	1	0	1	1	0
0	0	1	0	0	1	0	1	0	1
1	1	0	0	0	0	1	0	0	1
1	1	1	1	0	0	1	1	1	1
1	1	0	0	1	1	0	1	1	1
1	1	1	0	0	1	0	0	0	1
1	1	1	1	1	1	1	0	0	1
1	1	1	1	0	1	1	1	0	1
1	1	1	1	0	0	1	1	0	1
0	0	1	0	0	0	0	0	0	0
1	1	0	1	0	1	0	0	0	1
0	1	1	1	0	0	0	0	0	0
0	0	1	0	0	1	0	0	0	0
1	1	1	1	0	0	1	0	0	1
1	1	1	0	1	1	0	1	1	1
1	1	1	1	0	1	1	1	1	1
1	1	0	0	1	1	1	0	0	1
1	1	1	1	0	1	1	0	0	1
1	1	1	1	0	0	1	1	0	1
0	0	0	1	0	0	0	0	0	0
0	0	0	0	0	0	0	1	0	0
1	0	0	0	1	0	0	0	0	1
1	1	0	0	1	1	0	1	1	1
1	0	0	0	0	0	1	1	0	0
0	0	0	0	0	0	0	0	0	0
0	0	0	0	0	1	0	0	1	0
1	1	0	1	1	0	1	1	1	1
1	0	0	1	1	1	0	1	1	0
1	1	1	1	0	0	1	0	0	1
0	0	0	0	0	0	0	1	0	0
1	0	0	1	1	0	0	1	0	0
1	1	0	0	1	1	0	1	1	1
1	1	0	1	1	1	0	1	1	0
1	0	0	0	1	0	0	1	0	0
1	1	0	0	1	1	0	0	1	1
1	0	0	0	1	0	1	1	0	0
0	1	1	0	0	1	0	1	0	1
0	1	0	0	0	1	0	0	0	1
1	0	0	1	1	0	1	1	0	1
0	0	0	0	1	0	0	0	0	0
1	0	0	1	1	0	1	1	0	1
0	1	1	1	0	0	0	0	0	0
0	0	0	0	0	0	0	1	0	0
1	1	1	0	0	1	1	0	0	1
1	0	0	0	1	1	0	0	0	1
0	0	1	0	1	0	0	0	0	0
1	1	0	0	1	0	1	0	0	1
0	0	0	0	0	0	0	0	0	0
1	0	0	0	1	0	0	1	1	1
1	0	0	1	1	0	1	1	1	1
1	1	0	1	1	1	0	1	0	1
1	1	0	1	1	1	1	1	1	1
0	1	0	0	0	1	0	0	0	0
1	0	0	1	1	0	1	1	0	0
1	1	0	0	1	0	1	1	0	1
1	0	0	0	1	1	0	1	1	1
1	1	1	0	0	1	0	0	0	1
1	0	0	0	1	0	0	0	0	1
1	1	1	1	1	0	1	1	0	1
1	1	1	1	0	1	1	1	1	1
1	0	1	0	1	0	0	0	0	1
0	0	0	0	0	1	0	0	0	1
0	1	1	0	0	0	0	0	0	0
1	1	1	1	0	1	0	1	1	1
1	0	0	1	1	0	1	0	1	1
1	0	1	0	0	1	0	0	1	1
1	0	1	0	0	1	0	0	0	0
1	1	1	1	0	1	1	1	1	1
0	1	0	0	0	0	0	0	0	0
1	0	0	1	1	0	1	1	0	1
1	0	0	1	1	1	0	1	1	1
0	0	0	0	0	0	0	0	0	0
1	0	0	0	1	0	0	1	0	1
1	0	1	1	0	1	1	0	0	1
1	1	1	1	0	1	1	1	0	1
1	0	0	0	1	0	1	1	0	1
0	1	0	0	0	0	0	0	0	0
1	0	0	0	0	0	0	0	0	1
1	1	0	1	0	1	0	0	0	1
1	0	0	0	1	0	1	1	0	0
0	0	0	0	0	0	0	0	0	0
1	1	1	1	0	1	1	1	1	1
1	1	1	1	0	1	1	0	1	1
0	0	0	0	0	0	0	0	0	0
1	1	1	1	0	0	1	0	0	1
1	0	0	0	0	0	0	1	1	0
1	1	1	0	0	1	0	0	0	1
1	1	1	1	0	1	0	0	0	0
0	1	0	0	0	1	0	1	1	1
1	1	0	0	1	1	0	1	1	1
1	0	1	1	1	0	0	1	0	0
1	0	0	0	1	1	0	1	1	1
1	1	1	1	1	1	1	1	1	1
1	1	1	1	0	1	0	1	1	1
1	1	1	1	1	1	0	1	1	1
1	1	0	0	0	1	0	1	1	1
1	0	0	0	0	0	1	1	0	1
0	1	0	0	0	1	0	0	0	1
1	1	1	0	0	1	0	0	0	1
1	1	0	1	0	1	1	1	1	1
1	1	1	1	1	0	1	1	0	1
1	1	0	1	0	0	1	1	1	1
1	1	1	1	0	1	1	1	0	1
1	1	0	1	0	0	1	1	1	0
0	0	0	0	0	0	0	0	0	0
1	1	0	0	0	1	0	0	0	1
0	0	0	0	0	0	0	0	0	0
1	0	1	0	0	0	1	0	0	1
0	0	0	0	1	0	0	0	0	0
1	0	1	1	0	1	0	0	0	1
1	1	1	1	0	1	1	1	0	1
0	1	0	1	0	0	1	1	0	1
1	1	0	0	1	0	0	1	1	0
1	1	1	0	0	1	0	0	1	1
0	1	0	0	0	1	0	0	1	1
1	1	1	1	0	1	1	1	0	1
0	1	1	0	0	1	1	0	0	1
1	1	1	1	1	1	1	1	0	1
1	1	0	0	1	1	1	1	1	1
1	1	1	1	0	1	1	1	1	1
1	1	1	1	0	1	1	1	1	1
1	1	1	1	0	1	0	1	1	1
1	0	0	0	1	0	0	0	1	1
1	1	0	0	1	1	0	0	1	1
1	0	0	1	0	0	0	0	0	0
1	0	0	0	0	1	0	0	0	0
1	0	0	0	1	1	0	1	0	0
1	1	1	1	0	1	0	1	1	0
1	1	1	0	1	1	0	1	1	1
1	1	0	1	1	1	0	1	1	0
0	1	0	0	1	1	0	0	1	1
1	1	1	1	0	1	0	1	1	0
0	0	0	0	0	0	0	0	0	0
1	1	1	1	0	1	1	1	1	1
0	0	0	0	0	0	0	0	0	0
1	1	0	1	0	1	0	1	0	0
1	1	0	1	0	1	0	0	0	1
1	0	0	0	0	0	0	0	0	1
1	0	0	0	1	1	1	1	1	0
1	1	0	0	0	1	0	0	1	0
1	1	1	0	0	1	0	0	1	1
1	1	1	1	1	1	1	1	1	1
1	0	0	0	1	0	1	1	0	1
1	1	0	0	1	0	1	0	0	1
1	1	0	1	1	1	0	1	1	1
1	1	0	1	0	0	1	1	1	1
1	1	0	0	1	1	1	1	0	1
0	1	1	0	0	1	0	0	0	0
1	0	0	0	1	0	0	1	0	0
1	1	1	0	1	1	1	1	1	1
1	1	0	1	1	0	1	1	0	1
1	0	0	1	1	0	0	1	0	0
1	1	0	0	1	1	0	1	1	1
1	0	0	0	1	1	0	0	1	1
1	1	1	1	0	1	1	1	1	1
1	1	0	0	1	1	0	1	1	1
1	1	1	1	1	1	1	1	1	1
0	0	0	0	0	0	0	0	0	0
1	1	1	1	0	0	1	0	0	1
1	1	1	1	1	0	1	1	0	1
1	0	0	0	1	0	1	1	0	0
1	0	0	0	1	0	0	0	1	1
1	1	0	0	1	1	0	1	1	1
1	1	0	0	0	0	0	0	0	1
1	0	0	0	1	1	0	0	1	1
1	0	1	0	1	0	0	0	0	0
1	0	0	0	1	1	0	1	0	1
1	1	0	1	1	1	1	1	0	1
1	1	1	1	0	1	1	0	0	1
1	0	0	0	1	1	0	1	1	1
1	1	1	0	0	1	0	0	0	1
1	0	1	1	1	0	1	1	0	1
1	1	1	1	0	1	0	1	0	1
1	1	0	0	0	1	0	1	1	1
0	0	0	0	0	0	0	0	0	1
1	1	0	0	1	1	0	1	1	1
1	1	1	1	0	0	0	1	0	1
1	0	0	0	0	0	0	0	0	0
0	0	0	0	0	0	0	0	0	0
0	0	0	0	0	1	0	0	0	0
1	1	1	1	1	1	1	1	1	1
0	1	1	0	0	0	0	0	0	0
1	1	1	1	0	1	1	1	0	1
0	0	0	0	0	0	0	0	0	0
1	0	0	1	1	0	1	1	0	0
1	0	0	1	0	0	1	1	1	0
1	1	1	1	0	0	1	0	0	0
1	1	0	1	1	1	0	1	1	1
1	1	0	1	1	1	1	1	1	1
1	1	1	1	0	1	1	1	1	0
1	0	1	1	0	1	0	1	0	0
1	1	1	1	0	0	1	1	0	1
0	0	0	0	0	1	0	0	0	0
1	1	0	0	1	1	0	1	1	1
1	1	0	0	1	1	0	1	1	1
1	0	0	0	1	1	0	0	1	1
0	0	0	0	0	1	0	0	0	0
1	1	1	0	0	1	1	0	0	1
0	0	0	0	0	0	0	1	0	0
1	1	1	1	1	0	1	1	1	1
1	1	1	1	1	1	1	1	0	1
1	1	1	1	0	1	0	1	0	1
1	1	0	0	1	1	0	1	0	0
1	1	1	0	0	0	0	0	0	1
1	1	0	0	1	0	1	1	0	1
1	1	1	0	0	1	1	0	0	1
1	1	1	0	0	1	0	1	1	1
0	0	0	0	1	0	0	0	0	0
0	1	0	0	0	0	0	0	0	1
1	0	0	1	0	1	0	1	1	1
1	1	1	1	0	1	1	1	1	1
0	1	1	0	0	1	0	0	0	1
1	1	1	1	0	1	1	1	0	1
1	0	1	1	0	0	0	0	0	0
0	1	1	0	0	1	0	1	1	0
1	0	1	0	1	1	0	0	0	1
0	0	0	0	0	0	0	0	0	1
0	0	0	0	0	0	0	0	0	0
1	1	1	0	0	0	1	0	0	1
1	1	1	1	0	1	1	1	1	1
1	1	0	0	1	1	0	1	1	0
1	0	0	0	0	0	1	0	0	1
1	0	0	0	1	1	0	1	0	1
1	0	0	1	1	0	0	1	0	0
1	1	1	1	0	0	1	1	1	1
1	1	1	1	0	0	1	1	0	1
1	0	0	0	1	1	0	1	0	0
1	1	1	0	0	1	0	0	1	1
1	1	0	0	1	1	0	1	1	0
0	0	0	0	1	0	0	1	1	1
1	1	0	0	1	1	1	1	0	1
1	1	1	0	0	1	0	0	0	1
1	0	0	0	1	0	1	1	1	1
0	0	0	1	0	0	0	0	1	0
1	0	0	0	1	0	1	1	0	0
1	0	0	0	1	0	1	0	0	1
1	0	1	1	1	0	1	0	0	1
1	0	0	0	1	0	1	1	1	1
0	0	0	0	0	0	0	1	0	0
0	0	0	0	1	0	0	0	0	0
1	1	1	0	0	1	0	0	1	0
1	1	1	1	0	0	1	0	0	1
0	0	0	0	0	0	0	0	0	0
1	1	1	1	0	1	0	1	1	0
1	0	1	1	0	0	1	1	0	0
1	1	0	0	1	1	0	1	1	1
1	0	0	0	1	1	0	1	1	1
1	1	1	1	0	0	1	0	1	1
1	1	1	1	0	1	0	1	1	1
1	1	1	1	1	0	1	1	0	1
0	0	0	0	0	0	0	0	0	0
1	1	0	1	0	1	0	1	1	0
1	1	1	0	0	0	1	0	1	1
1	0	0	0	0	0	0	0	0	0
0	0	0	0	0	0	0	0	0	0
1	0	0	0	1	0	0	1	1	0
1	1	1	1	0	1	1	1	0	1
1	0	0	0	0	0	1	1	0	0
1	1	0	0	1	1	0	1	1	1
1	1	1	1	1	0	1	1	1	1
1	0	1	0	1	0	1	0	0	1
1	1	1	1	0	0	1	1	1	1
1	1	1	1	0	1	1	1	1	1
1	1	1	1	1	0	1	0	0	1
1	1	0	0	1	1	0	1	1	1
1	1	0	0	0	1	0	1	1	1
1	1	0	1	1	1	1	1	1	1
1	1	1	1	1	0	1	1	0	0
1	1	1	1	0	1	1	1	0	0
0	1	0	0	0	0	0	0	1	1
0	1	1	0	0	0	0	0	0	0
1	0	0	0	1	1	0	1	1	1
1	1	1	0	0	1	0	1	1	1
1	1	1	0	0	1	0	0	0	1
1	1	1	1	0	1	1	1	1	1
1	1	0	1	1	1	1	1	1	1
1	1	1	1	0	1	1	0	0	1
1	0	0	0	1	0	1	1	1	1
1	1	0	1	0	0	1	1	1	1
1	0	1	1	1	0	0	1	0	0
1	1	1	1	0	1	1	1	1	1
1	0	0	1	1	0	0	0	0	0
1	1	0	0	0	1	0	0	1	1
1	0	0	0	1	0	0	0	0	0
0	0	0	0	0	0	1	0	0	1
0	1	1	0	0	1	0	0	1	1
0	0	1	1	0	1	0	0	0	0
1	0	0	0	1	0	1	1	0	1
1	1	0	0	1	1	0	0	1	1
0	1	0	0	0	0	0	0	1	0
0	0	0	0	0	0	0	0	0	0
1	1	0	1	1	1	1	1	1	0
1	1	0	0	1	0	0	1	1	1
1	0	1	1	0	1	0	1	1	0
1	1	1	1	0	0	1	1	0	0
1	1	0	0	1	1	0	1	0	0
1	1	1	1	0	1	0	1	1	1
1	0	0	1	1	0	0	1	0	0
1	1	1	1	0	1	1	1	0	1
1	0	0	0	1	1	0	1	0	0
1	1	1	1	0	1	1	1	0	1
1	1	0	0	1	1	0	1	1	1
0	1	1	1	0	1	0	0	0	1
1	0	1	1	0	1	0	0	0	0
1	1	1	1	0	1	1	0	0	0
1	1	1	1	0	1	0	0	0	1
1	1	1	1	1	1	1	1	1	1
1	0	1	1	1	1	0	1	1	1
1	1	1	1	0	1	1	0	1	1
1	1	1	0	0	0	0	0	0	0
1	1	1	1	0	0	1	1	0	1
1	1	1	0	0	1	1	1	0	1
1	1	0	0	1	0	0	1	1	1
1	0	0	0	0	0	0	1	1	0
1	0	1	0	1	0	1	0	0	1
1	1	0	1	1	0	1	1	0	1
1	1	0	0	1	1	0	0	1	1
0	0	0	0	0	0	0	0	0	0
1	1	1	0	1	1	0	0	0	1
0	1	0	0	0	1	0	0	1	1
1	1	0	0	1	1	0	0	0	1
1	1	0	1	0	1	1	1	1	1
1	1	0	0	1	1	0	1	0	0
1	0	0	1	1	0	1	1	1	0
1	1	1	1	1	1	1	1	1	1
1	1	1	0	0	1	0	1	1	1
1	0	0	1	1	1	0	1	0	0
1	0	0	0	1	1	0	1	1	0
0	1	1	1	0	0	0	1	0	0
1	0	1	1	0	1	0	0	0	0
1	1	1	1	0	1	1	0	0	1
1	1	1	1	1	1	1	1	1	1
0	0	0	0	0	0	0	0	0	0
1	1	1	1	0	0	1	1	0	1
1	1	1	0	0	1	1	1	0	1
0	0	0	0	0	0	0	0	0	0
1	1	0	0	1	0	0	1	1	1
1	0	0	0	0	0	0	1	1	1
0	0	0	0	0	0	0	0	0	0
1	0	1	0	1	0	1	0	0	1
1	1	1	0	1	1	0	0	0	1
0	0	0	0	0	0	0	0	0	0
0	1	0	0	0	1	0	0	1	1
1	1	0	0	1	1	0	0	0	1
1	1	0	1	0	1	1	1	1	1
1	1	0	0	1	1	0	1	0	0
1	0	0	1	1	0	1	1	1	0
1	1	0	1	1	0	1	1	0	1
1	1	0	0	1	1	0	0	1	1
1	1	1	0	0	1	0	1	1	1
1	0	0	1	1	1	0	1	0	0
1	0	0	0	1	1	0	1	1	0
0	1	1	1	0	0	0	1	0	0
1	0	1	1	0	1	0	0	0	0
1	1	1	1	0	1	1	0	0	0
1	1	1	1	0	1	0	0	0	1
1	1	1	1	1	1	1	1	1	1
1	0	1	1	1	1	0	1	1	1
1	1	1	1	0	1	1	0	1	1
1	1	1	0	0	0	0	0	0	0
1	1	1	1	0	0	1	1	0	1
1	1	1	0	0	1	1	1	0	1
1	1	0	0	1	0	0	1	1	1
1	0	0	0	0	0	0	1	1	0
1	0	1	0	1	0	1	0	0	1
1	1	0	1	1	0	1	1	0	1
1	1	0	0	1	1	0	0	1	1
1	1	1	0	1	1	0	0	0	1
1	1	1	1	1	1	1	1	1	1
0	1	0	0	0	1	0	0	1	1
1	1	0	0	1	1	0	0	0	1
1	1	0	1	0	1	1	1	1	1
1	1	0	0	1	1	0	1	0	0
1	0	0	1	1	0	1	1	1	0
1	1	1	0	0	1	0	1	1	1
1	0	0	1	1	1	0	1	0	0
1	0	0	0	1	1	0	1	1	0
0	1	1	1	0	0	0	1	0	0
1	0	1	1	0	1	0	0	0	0
1	1	1	1	0	1	1	0	0	1
1	1	1	1	1	1	1	1	1	1
1	1	1	1	0	0	1	1	0	1
1	1	1	0	0	1	1	1	0	1
0	0	0	0	0	0	0	0	0	0
1	1	0	0	1	0	0	1	1	1
1	0	0	0	0	0	0	1	1	1
1	0	1	0	1	0	1	0	0	1
0	0	0	0	0	0	0	0	0	0
1	1	1	0	1	1	0	0	0	1
0	1	0	0	0	1	0	0	1	1
1	1	0	0	1	1	0	0	0	1
1	1	0	1	0	1	1	1	1	1
1	1	0	0	1	1	0	1	0	0
1	0	0	1	1	0	1	1	1	0
1	1	0	1	1	0	1	1	0	1
1	1	0	0	1	1	0	0	1	1
1	1	1	0	0	1	0	1	1	1
1	0	0	1	1	1	0	1	0	0
1	0	0	0	1	1	0	1	1	0
0	1	1	1	0	0	0	1	0	0
1	0	1	1	0	1	0	0	0	0
1	1	1	1	0	1	1	0	0	0
1	1	1	1	0	1	0	0	0	1
1	1	1	1	1	1	1	1	1	1
1	0	1	1	1	1	0	1	1	1
1	1	1	1	0	1	1	0	1	1
1	1	1	0	0	0	0	0	0	0
1	1	1	1	0	0	1	1	0	1
1	1	1	0	0	1	1	1	0	1
1	1	0	0	1	0	0	1	1	1
1	0	0	0	0	0	0	1	1	0
1	0	1	0	1	0	1	0	0	1
1	1	0	1	1	0	1	1	0	1
1	1	0	0	1	1	0	0	1	1
0	0	0	0	0	0	0	0	0	0
1	1	1	0	1	1	0	0	0	1
0	1	0	0	0	1	0	0	1	1
1	1	0	0	1	1	0	0	0	1
1	1	0	1	0	1	1	1	1	1
1	1	0	0	1	1	0	1	0	0
1	0	0	1	1	0	1	1	1	0
1	1	1	1	1	1	1	1	1	1
1	1	1	0	0	1	0	1	1	1
1	0	0	1	1	1	0	1	0	0
1	0	0	0	1	1	0	1	1	0
0	1	1	1	0	0	0	1	0	0
1	0	1	1	0	1	0	0	0	0
1	1	1	1	0	1	1	0	0	1
1	1	1	1	1	1	1	1	1	1
0	0	0	0	0	0	0	0	0	0
1	1	1	1	0	0	1	1	0	1
1	1	1	0	0	1	1	1	0	1
0	0	0	0	0	0	0	0	0	0
1	1	0	0	1	0	0	1	1	1
1	0	0	0	0	0	0	1	1	1
0	0	0	0	0	0	0	0	0	0
1	0	1	0	1	0	1	0	0	1
1	1	1	0	1	1	0	0	0	1
0	0	0	0	0	0	0	0	0	0
0	1	0	0	0	1	0	0	1	1
1	1	0	0	1	1	0	0	0	1
1	1	0	1	0	1	1	1	1	1
1	1	0	0	1	1	0	1	0	0
1	0	0	1	1	0	1	1	1	0
1	1	0	1	1	0	1	1	0	1
1	1	0	0	1	1	0	0	1	1
1	1	1	0	0	1	0	1	1	1
1	0	0	1	1	1	0	1	0	0
1	0	0	0	1	1	0	1	1	0
0	1	1	1	0	0	0	1	0	0
1	0	1	1	0	1	0	0	0	0
1	1	1	1	0	1	1	0	0	0
1	1	1	1	0	1	0	0	0	1
1	1	1	1	1	1	1	1	1	1
1	0	1	1	1	1	0	1	1	1
1	1	1	1	0	1	1	0	1	1
1	1	1	0	0	0	0	0	0	0
1	1	1	1	0	0	1	1	0	1
1	1	1	0	0	1	1	1	0	1
1	1	0	0	1	0	0	1	1	1
1	0	0	0	0	0	0	1	1	0
1	0	1	0	1	0	1	0	0	1
1	1	0	1	1	0	1	1	0	1
1	1	0	0	1	1	0	0	1	1
1	1	1	0	1	1	0	0	0	1
1	1	1	1	1	1	1	1	1	1
0	1	0	0	0	1	0	0	1	1
1	1	0	0	1	1	0	0	0	1
1	1	0	1	0	1	1	1	1	1
1	1	0	0	1	1	0	1	0	0
1	0	0	1	1	0	1	1	1	0
1	1	1	0	0	1	0	1	1	1
1	0	0	1	1	1	0	1	0	0
1	0	0	0	1	1	0	1	1	0
0	1	1	1	0	0	0	1	0	0
1	0	1	1	0	1	0	0	0	0
1	1	1	1	0	1	1	0	0	1
1	1	1	1	1	1	1	1	1	1
1	1	1	1	0	0	1	1	0	1
1	1	1	0	0	1	1	1	0	1
0	0	0	0	0	0	0	0	0	0
1	1	0	0	1	0	0	1	1	1
1	0	0	0	0	0	0	1	1	1
1	0	1	0	1	0	1	0	0	1
0	0	0	0	0	0	0	0	0	0
1	1	1	0	1	1	0	0	0	1
0	1	0	0	0	1	0	0	1	1
1	1	0	0	1	1	0	0	0	1
1	1	0	1	0	1	1	1	1	1
1	1	0	0	1	1	0	1	0	0
1	0	0	1	1	0	1	1	1	0
1	1	0	1	1	0	1	1	0	1
1	1	0	0	1	1	0	0	1	1
1	1	1	0	0	1	0	1	1	1
1	0	0	1	1	1	0	1	0	0
1	0	0	0	1	1	0	1	1	0
0	1	1	1	0	0	0	1	0	0
1	0	1	1	0	1	0	0	0	0
1	1	1	1	0	1	1	0	0	0
1	1	1	1	0	1	0	0	0	1
1	1	1	1	1	1	1	1	1	1
1	0	1	1	1	1	0	1	1	1
1	1	1	1	0	1	1	0	1	1
1	1	1	0	0	0	0	0	0	0
1	1	1	1	0	0	1	1	0	1
1	1	1	0	0	1	1	1	0	1
1	1	0	0	1	0	0	1	1	1
1	0	0	0	0	0	0	1	1	0
1	0	1	0	1	0	1	0	0	1
1	1	0	1	1	0	1	1	0	1
1	1	0	0	1	1	0	0	1	1
0	0	0	0	0	0	0	0	0	0
1	1	1	0	1	1	0	0	0	1
0	1	0	0	0	1	0	0	1	1
1	1	0	0	1	1	0	0	0	1
1	1	0	1	0	1	1	1	1	1
1	1	0	0	1	1	0	1	0	0
1	0	0	1	1	0	1	1	1	0
1	1	1	1	1	1	1	1	1	1
1	1	1	0	0	1	0	1	1	1
1	0	0	1	1	1	0	1	0	0
1	0	0	0	1	1	0	1	1	0
0	1	1	1	0	0	0	1	0	0
1	0	1	1	0	1	0	0	0	0
1	1	1	1	0	1	1	0	0	1
1	1	1	1	1	1	1	1	1	1
0	0	0	0	0	0	0	0	0	0
1	1	1	1	0	0	1	1	0	1
1	1	1	0	0	1	1	1	0	1
0	0	0	0	0	0	0	0	0	0
1	1	0	0	1	0	0	1	1	1
1	0	0	0	0	0	0	1	1	1
0	0	0	0	0	0	0	0	0	0
1	0	1	0	1	0	1	0	0	1
1	1	1	0	1	1	0	0	0	1
0	0	0	0	0	0	0	0	0	0
0	1	0	0	0	1	0	0	1	1
1	1	0	0	1	1	0	0	0	1
1	1	0	1	0	1	1	1	1	1
1	1	0	0	1	1	0	1	0	0
1	0	0	1	1	0	1	1	1	0
1	1	0	1	1	0	1	1	0	1
1	1	0	0	1	1	0	0	1	1
1	1	1	0	0	1	0	1	1	1
1	0	0	1	1	1	0	1	0	0
1	0	0	0	1	1	0	1	1	0
0	1	1	1	0	0	0	1	0	0
1	0	1	1	0	1	0	0	0	0
1	1	1	1	0	1	1	0	0	0
1	1	1	1	0	1	0	0	0	1
1	1	1	1	1	1	1	1	1	1
1	0	1	1	1	1	0	1	1	1
1	1	1	1	0	1	1	0	1	1
1	1	1	0	0	0	0	0	0	0
1	1	1	1	0	0	1	1	0	1
1	1	1	0	0	1	1	1	0	1
1	1	0	0	1	0	0	1	1	1
1	0	0	0	0	0	0	1	1	0
1	0	1	0	1	0	1	0	0	1
1	1	0	1	1	0	1	1	0	1
1	1	0	0	1	1	0	0	1	1
1	1	1	0	1	1	0	0	0	1
1	1	1	1	1	1	1	1	1	1
0	1	0	0	0	1	0	0	1	1
1	1	0	0	1	1	0	0	0	1
1	1	0	1	0	1	1	1	1	1
1	1	1	0	0	1	1	0	0	1
1	0	0	0	1	0	1	1	1	1
1	1	1	0	0	1	1	1	0	1
1	0	1	0	1	0	0	0	1	1
0	1	1	1	0	0	1	0	0	0
1	1	1	1	1	1	1	1	1	1
0	0	1	0	0	0	0	0	0	0
0	0	0	0	0	1	0	0	1	0
1	0	0	1	1	1	0	1	1	0
1	1	1	0	1	1	0	1	1	1
1	0	0	1	1	1	0	1	0	0
1	1	1	1	1	1	1	1	1	1
1	1	0	1	1	1	0	1	1	1
1	1	1	1	0	1	1	1	0	1
1	1	0	0	1	0	0	1	0	1
1	1	1	1	0	1	1	1	1	1
1	1	1	1	0	1	1	1	1	0
1	0	1	1	0	0	1	1	0	1
1	0	0	0	1	0	1	1	0	1
1	1	1	0	0	1	0	1	0	1
1	1	0	0	1	1	0	1	1	1
1	1	0	0	1	1	0	1	1	1
1	0	0	0	1	0	0	1	1	1
1	0	0	1	1	1	1	1	1	1
1	0	0	1	1	1	1	1	0	1
0	1	1	1	0	1	0	0	0	0
1	1	1	0	1	1	0	1	0	1
1	1	0	0	1	1	0	1	1	1
1	0	0	0	1	1	0	0	0	0
1	1	0	0	1	1	0	1	1	1
1	0	1	1	0	0	1	0	0	1
0	1	1	0	0	0	0	0	0	1
1	1	1	1	1	1	0	1	1	1
1	1	0	0	1	1	0	1	1	1
1	0	1	0	1	0	0	0	0	0
1	1	1	0	0	1	0	0	0	1
1	0	0	1	1	1	0	1	1	1
1	1	1	1	0	1	0	0	0	1
1	1	1	1	0	1	0	1	1	0
1	1	0	0	1	1	0	0	0	1
1	1	1	1	0	0	1	1	0	0
1	1	0	1	0	1	0	1	1	1
1	1	1	1	0	1	0	1	1	0
1	0	0	0	1	0	0	1	0	0
1	1	1	1	1	0	1	1	0	1
1	1	1	1	0	1	0	1	1	0
1	1	0	0	1	1	0	1	1	1
1	0	0	1	1	0	1	1	0	0
1	1	1	1	0	1	1	0	1	1
1	0	0	1	0	0	0	1	0	0
1	1	1	0	0	1	0	0	0	1
1	0	1	1	0	1	1	1	0	0
1	1	1	1	0	1	0	1	1	1
1	1	0	0	1	1	1	1	1	1
1	1	0	0	1	1	0	1	1	1
1	0	0	0	1	0	0	1	1	1
1	0	0	0	0	0	0	1	0	1
1	1	1	1	1	0	1	1	0	1
1	1	1	0	0	1	0	1	1	1
0	0	0	0	0	1	0	0	1	0
1	1	0	0	1	0	0	0	0	0
1	0	1	1	0	1	0	0	0	0
1	1	1	1	1	1	0	1	1	1
1	1	1	0	0	1	1	1	0	1
1	1	1	1	1	1	1	1	1	1
1	0	1	1	0	1	0	1	1	0
1	1	0	1	1	0	1	1	0	1
1	0	0	0	1	0	1	0	0	1
1	0	0	0	1	1	1	1	0	0
1	1	1	0	0	0	0	0	0	1
1	1	0	0	1	1	0	1	1	1
1	1	1	1	0	1	1	1	0	1
1	0	0	0	1	1	0	1	0	1
1	0	0	0	1	1	0	1	1	0
1	1	1	1	0	0	1	1	0	0
1	0	0	1	1	0	1	1	0	0
1	1	0	1	0	1	1	1	1	1
1	0	1	0	1	1	0	0	0	0
1	0	0	0	1	0	0	1	1	0
1	1	0	0	1	1	0	0	0	1
1	1	1	1	1	1	1	1	0	1
1	0	0	0	1	0	0	1	0	0
1	0	0	0	1	0	0	1	0	1
1	1	0	0	1	0	0	1	1	1
1	1	0	0	0	1	0	1	1	1
1	0	0	0	1	0	0	1	0	1
1	1	0	0	1	0	1	0	0	1
1	1	1	0	0	1	1	0	0	1
1	1	1	1	1	1	0	1	1	0
1	1	1	1	0	0	1	0	0	1
1	1	0	0	1	1	1	1	0	1
0	1	0	0	0	0	0	0	0	1
1	1	0	0	1	1	0	1	1	1
1	0	1	0	0	1	0	0	0	0
1	1	1	0	0	1	0	0	1	1
1	0	0	0	1	0	0	0	1	0
0	0	0	0	0	0	0	0	0	0
0	0	0	0	0	0	0	0	0	0
1	0	0	0	1	0	0	1	0	0
1	0	0	0	1	0	0	1	0	0
1	1	0	1	0	1	0	1	1	1
1	1	1	1	0	1	1	1	1	1
1	1	0	1	1	1	0	1	0	0
1	0	0	1	1	0	1	1	0	0
0	0	0	0	0	1	0	0	0	0
1	1	1	1	0	1	1	1	1	1
1	1	1	1	0	1	0	1	1	0
0	0	0	0	0	0	0	0	0	0
1	0	0	1	1	1	0	1	1	0
1	1	1	0	0	1	1	1	1	1
1	0	0	0	1	0	0	0	0	0
0	0	0	0	0	0	0	1	0	0
1	1	1	1	0	1	1	0	0	1
1	1	0	0	1	1	0	1	1	1
1	0	0	1	1	0	0	1	0	0
1	1	0	1	0	1	0	1	1	0
0	0	0	0	0	0	0	0	1	1
1	0	0	0	1	1	0	1	1	0
0	0	0	0	0	0	0	0	0	0
1	0	0	0	1	0	0	0	0	0
1	0	0	0	0	1	0	1	1	0
1	1	1	1	0	0	1	0	0	1
1	1	1	0	0	1	0	0	0	1
0	0	0	0	0	0	0	0	0	0
0	1	0	0	0	1	0	0	1	0
1	1	0	0	1	1	0	1	1	1
0	0	0	0	0	0	0	0	0	0
0	0	0	0	1	0	0	1	1	1
0	1	1	1	0	1	1	0	1	1
1	1	1	1	1	1	1	1	1	1
0	0	0	0	0	0	0	0	0	0
1	1	1	0	0	1	1	0	0	1
1	1	1	0	0	1	0	0	0	1
0	1	1	0	0	1	0	1	1	0
1	1	1	1	0	1	1	1	0	1
1	1	0	1	1	1	0	1	1	1
0	0	0	0	0	1	0	0	0	1
1	1	1	1	1	0	1	1	0	1
0	1	0	0	0	0	0	0	0	0
1	0	1	1	1	1	1	1	0	1
1	1	0	0	1	0	1	1	1	1
1	0	0	0	0	0	0	0	0	1
0	0	0	0	0	1	0	0	0	1
1	0	1	1	1	1	0	1	0	0
1	0	0	0	1	1	0	1	1	0
1	1	0	1	1	1	0	1	1	1
1	1	0	1	0	1	1	1	1	1
1	1	1	0	0	1	0	1	1	1
1	1	0	0	0	0	0	1	0	1
1	0	0	0	0	0	1	0	0	1
1	1	0	1	1	1	0	1	1	1
1	0	0	0	1	0	0	0	0	1
1	1	0	1	0	1	0	1	0	0
1	1	1	1	0	1	0	0	1	1
1	1	0	0	1	0	0	1	1	0
1	0	0	1	1	1	0	1	0	1
1	1	1	1	0	1	1	1	0	1
1	1	1	0	0	0	1	0	0	1
1	1	1	1	0	1	1	1	1	1
1	0	1	1	1	0	1	0	0	0
1	0	0	1	1	0	1	1	0	0
1	0	0	0	1	0	0	1	0	0
1	1	1	1	0	1	0	1	0	0
1	1	0	1	0	1	0	0	1	0
1	1	1	1	0	1	1	1	1	1
1	1	1	0	1	1	0	1	1	1
1	1	1	1	0	1	1	0	1	1
1	1	1	1	0	0	1	1	1	1
1	0	0	0	1	0	0	1	0	0
1	1	1	0	0	1	0	1	0	0
1	1	0	0	1	1	0	1	1	1
1	1	0	1	1	1	1	1	1	1
1	1	0	0	1	1	0	0	1	1
0	0	1	0	0	0	0	0	0	1
1	1	0	0	0	1	0	1	1	1
1	0	0	0	1	1	1	1	1	1
1	0	0	0	0	0	0	1	1	0
1	1	0	0	1	1	0	1	1	1
1	1	0	0	0	1	0	1	1	1
1	1	0	0	0	1	0	0	1	1
1	0	0	0	1	0	1	0	0	1
0	0	0	0	1	0	1	0	0	0
1	1	0	0	1	1	0	1	1	1
1	1	1	0	0	0	0	0	0	1
1	0	0	0	1	0	1	1	0	1
1	0	0	0	1	1	0	1	1	0
1	1	0	0	1	1	0	1	1	1
1	0	0	1	1	1	0	0	1	0
1	0	1	0	0	0	0	1	0	0
1	0	0	0	0	0	0	1	1	0
1	0	0	1	1	0	1	1	0	1
1	1	0	1	1	1	1	1	0	1
1	0	0	0	1	0	0	1	0	0
1	1	1	1	0	1	1	1	1	1
1	0	0	0	0	0	0	1	0	0
1	0	0	1	1	1	0	1	1	1
0	0	0	0	0	0	0	0	0	0
1	0	0	0	1	0	0	1	1	1
1	1	0	0	1	0	1	0	0	1
1	0	0	0	0	0	0	0	0	1
0	0	0	0	0	0	0	0	0	0
1	0	0	0	1	0	0	1	0	0
1	1	1	0	0	1	0	0	1	1
1	1	0	0	1	1	0	1	1	1
1	0	0	0	1	0	1	1	0	0
1	0	1	1	1	0	1	1	0	1
1	1	0	0	0	1	1	0	0	1
1	0	0	0	1	0	0	0	0	0
1	1	0	1	1	0	0	1	1	1
1	0	0	0	1	1	0	1	0	0
1	1	1	0	0	1	1	0	0	1
0	0	0	0	0	0	0	1	0	0
1	1	1	1	1	0	1	1	1	1
1	1	1	0	0	1	0	0	0	1
1	1	1	1	0	1	0	0	0	1
1	0	0	1	1	1	0	1	1	0
1	1	1	0	1	0	1	1	1	1
0	1	0	0	0	0	0	0	0	1
1	0	1	1	0	0	1	0	0	1
0	1	0	0	0	1	0	0	0	1
0	0	0	0	0	0	0	0	0	0
0	1	0	0	0	0	0	0	0	1
1	1	1	0	1	0	1	1	0	1
0	0	1	0	0	0	0	0	0	0
1	0	0	1	1	0	0	1	1	0
0	0	0	0	0	0	0	0	0	0
1	1	0	0	1	1	0	1	1	1
0	1	1	0	0	1	0	0	1	0
1	0	1	1	1	0	1	1	0	1
0	0	1	0	0	1	0	1	1	0
1	0	1	1	1	1	0	1	1	0
1	1	0	0	1	1	0	1	1	1
1	1	0	0	0	0	0	1	1	0
1	0	0	0	0	0	0	0	0	0
1	1	1	1	1	1	0	0	1	0
0	1	0	0	0	0	0	0	0	0
1	0	0	1	1	0	0	0	0	0
1	0	0	0	1	0	0	1	0	0
1	0	1	0	1	0	1	1	1	1
1	1	1	0	0	1	0	0	0	1
1	1	1	1	0	1	0	1	0	1
1	1	1	0	0	1	0	0	0	1
1	0	0	0	1	0	0	1	0	0
1	1	1	1	0	1	1	1	0	1
1	1	1	1	0	1	0	1	1	1
1	1	1	1	0	1	1	1	0	1
1	1	1	0	0	1	0	0	1	1
1	1	1	1	0	1	0	0	0	1
1	1	1	1	0	1	1	0	1	1
0	0	0	0	0	0	0	0	0	0
0	1	1	0	0	1	0	0	0	1
0	0	0	0	0	0	0	0	0	0
1	1	1	1	0	1	1	1	1	1
1	1	1	1	0	0	1	1	1	1
1	0	0	0	1	1	0	0	1	1
1	1	1	1	0	1	1	1	1	1
0	0	0	0	0	0	0	0	0	0
0	0	0	0	0	0	0	0	0	0
1	0	0	0	0	0	0	0	0	1
1	1	0	0	1	1	1	1	1	1
1	1	1	1	1	0	1	1	0	1
1	0	1	1	0	0	1	1	0	1
1	0	0	0	1	0	0	0	1	1
1	1	1	1	0	1	0	1	1	0
1	1	0	0	0	1	0	1	1	1
1	1	1	0	0	1	0	1	1	0
1	1	1	1	0	0	1	1	1	1
1	0	0	0	0	1	1	0	0	1
1	0	0	0	1	0	0	1	0	0
1	0	1	1	1	0	1	0	0	0
1	1	0	0	1	1	0	0	1	1
1	1	1	1	1	1	1	1	0	1
0	1	1	1	0	0	1	1	0	1
1	1	1	1	1	1	1	1	1	1
1	1	1	1	1	1	1	1	1	1
1	1	1	1	0	1	0	1	0	1
1	1	0	0	1	1	0	1	1	1
1	1	0	0	1	1	1	1	0	1
0	0	1	0	0	0	0	1	0	0
0	0	0	0	0	0	0	1	1	0
0	1	0	0	0	0	0	0	0	0
1	1	1	1	1	0	1	1	1	1
1	1	1	0	0	1	1	1	1	1
1	1	1	1	1	1	1	1	0	1
0	1	0	0	0	1	0	0	0	1
1	0	0	0	0	0	0	1	1	0
1	1	0	0	1	1	1	1	1	1
1	1	0	0	1	1	0	1	1	0
1	1	1	0	0	0	1	0	0	1
1	1	1	1	0	0	1	1	0	0
1	1	1	1	1	0	1	1	0	1
1	1	0	1	0	1	1	1	1	1
0	1	1	0	0	0	0	0	0	0
1	0	0	1	1	1	0	0	1	0
1	1	0	1	1	1	0	1	0	0
0	1	0	0	0	0	0	1	1	0
0	0	0	0	0	0	0	0	0	0
1	0	0	0	1	1	0	1	1	0
0	0	0	0	0	0	1	1	0	1
1	1	1	1	0	1	0	1	1	1
1	0	0	0	1	0	0	1	0	1
1	1	0	0	1	1	1	1	0	1
1	1	1	0	0	1	0	0	1	1
1	0	0	1	1	0	1	1	0	1
1	0	0	0	1	0	0	1	1	1
1	0	0	0	0	0	1	0	0	0
1	1	1	0	0	1	1	0	1	1
1	1	0	0	0	1	0	1	0	1
0	1	1	0	0	0	0	0	0	0
1	1	0	0	0	1	0	1	1	0
1	1	1	0	1	1	0	0	1	1
1	1	1	0	0	0	0	1	0	1
1	1	0	0	1	1	0	1	0	1
1	0	0	1	1	0	0	1	0	0
1	1	1	1	0	1	1	1	0	1
1	1	1	1	0	0	1	1	0	1
1	0	0	0	1	0	1	1	0	0
1	1	1	1	0	0	1	1	0	1
1	0	0	0	1	1	0	1	1	0
0	1	0	0	0	1	0	0	0	0
0	1	1	0	0	1	0	1	0	1
1	0	0	0	1	0	1	1	0	0
1	1	1	0	0	1	0	0	1	1
1	0	0	0	1	0	1	0	0	1
0	0	0	0	0	0	1	0	0	0
1	0	1	1	0	0	1	1	0	0
1	1	0	0	1	1	0	1	0	1
1	0	0	0	0	0	1	1	1	0
0	0	0	1	1	0	1	1	0	0
1	0	0	0	1	0	1	0	0	0
1	1	0	1	1	1	0	1	1	1
1	1	1	0	0	1	1	0	0	1
1	1	0	0	1	0	1	1	0	1
1	0	1	1	0	0	0	1	0	0
1	1	1	1	0	0	0	1	1	0
1	0	0	0	0	0	0	0	0	0
1	0	0	0	1	0	0	0	0	0
0	0	0	0	1	0	0	0	0	1
1	1	1	1	0	0	1	0	0	1
1	1	1	1	1	0	1	1	0	1
1	1	1	0	0	0	1	0	0	1
1	0	1	0	1	0	1	0	0	1
0	1	1	0	0	1	0	0	0	1
1	0	0	0	1	0	0	1	0	0
1	0	0	1	0	0	1	0	0	0
1	1	1	1	0	1	0	1	1	1
1	0	0	0	1	1	0	0	1	0
1	1	0	0	1	1	0	0	1	1
0	0	0	0	0	0	0	0	0	0
1	1	1	0	0	1	1	1	0	1
1	1	0	0	1	0	1	0	0	1
1	1	0	0	1	0	0	0	0	1
1	0	0	0	0	0	0	0	0	0
1	1	0	0	1	1	0	1	1	1
1	0	0	0	1	0	0	1	1	0
0	0	0	0	0	0	0	0	0	0
0	1	0	0	0	1	0	0	1	1
1	1	1	0	0	1	1	0	0	1
1	0	1	1	1	0	1	1	0	0
1	1	0	0	1	0	1	1	0	0
1	1	0	1	1	1	1	1	1	1
1	0	0	1	1	1	0	1	1	1
1	0	0	1	1	1	1	1	1	1
0	0	1	0	0	0	0	0	0	1
0	0	1	0	0	0	1	1	0	0
1	1	1	0	0	0	1	0	0	1
0	0	1	1	0	0	0	0	0	0
1	1	0	0	1	1	0	1	0	1
1	1	0	0	1	0	1	1	0	1
0	0	1	0	0	1	0	0	0	0
1	1	0	0	1	0	0	1	1	1
1	1	1	1	0	1	1	1	0	1
1	1	1	1	0	1	0	1	1	1
1	1	0	0	1	1	0	1	1	1
1	0	1	0	0	0	0	0	0	1
1	1	0	0	0	0	1	0	0	1
0	0	0	0	0	0	1	0	0	1
1	1	0	0	0	0	0	1	0	0
1	1	1	0	1	1	0	1	0	1
1	1	0	0	1	1	1	1	0	1
1	1	1	1	0	1	0	1	0	0
1	0	0	0	1	0	0	1	1	0
1	1	1	0	0	1	0	0	0	1
0	0	0	0	1	0	0	1	0	0
1	0	0	1	1	0	1	1	0	1
0	0	0	0	0	0	0	1	0	0
1	1	1	1	0	1	1	1	0	1
1	1	0	0	0	0	0	0	1	1
1	0	0	1	1	1	0	1	1	0
1	0	0	0	1	0	1	0	0	0
1	0	0	0	1	0	1	1	0	1
1	1	1	1	1	0	1	1	0	1
1	1	1	1	0	1	1	1	0	1
1	1	0	0	0	1	0	1	1	1
1	0	0	1	1	1	0	1	0	0
1	1	1	0	1	0	1	1	0	1
1	0	0	0	1	0	0	1	1	0
0	0	0	0	0	0	0	0	0	0
1	0	1	0	0	0	0	1	0	0
1	1	1	1	0	1	1	1	0	0
1	1	0	0	1	0	1	1	1	1
0	1	1	0	0	1	0	0	0	0
1	1	1	0	0	0	1	0	0	1
1	0	0	0	1	0	1	1	0	1
1	0	0	0	1	1	0	1	1	1
1	1	1	1	0	1	0	1	1	1
1	1	1	0	0	1	0	1	1	1
0	0	0	0	0	0	0	0	0	0
1	1	0	0	1	1	0	1	1	1
1	1	0	0	1	1	0	1	1	1
1	1	1	1	0	1	1	0	0	1
0	0	0	0	1	0	0	0	0	0
1	1	1	1	1	1	0	1	1	0
1	1	1	1	0	1	1	1	1	1
1	1	1	1	0	0	0	0	0	1
1	0	0	0	1	0	0	0	0	0
1	0	1	1	0	0	1	0	0	1
1	1	1	1	0	0	1	1	0	1
1	1	0	0	1	0	0	1	1	1
1	1	1	1	0	0	0	1	0	1
1	1	1	1	1	1	1	1	1	1
1	1	1	1	0	0	1	1	1	1
1	1	0	0	0	1	0	0	0	1
1	1	1	0	0	1	0	1	0	1
1	0	0	0	1	0	0	1	1	0
1	0	0	0	0	0	0	1	0	0
1	1	1	1	1	0	1	1	0	1
1	1	1	1	1	0	1	1	0	1
1	1	1	1	1	0	1	1	0	1
1	1	0	0	1	0	0	1	1	1
0	0	1	0	0	0	0	0	0	1
1	1	0	0	1	1	0	0	0	1
1	1	1	1	0	1	1	1	0	1
1	1	1	1	0	1	1	0	0	1
1	1	0	0	1	1	0	1	1	1
1	1	1	0	1	1	0	0	0	1
1	1	0	0	1	0	0	0	0	1
1	0	0	0	1	0	0	1	0	0
1	1	1	1	0	1	0	1	1	0
1	0	1	0	0	1	0	0	0	0
1	1	1	1	1	1	1	1	1	1
0	0	1	0	0	1	0	0	0	1
0	0	0	0	0	0	0	0	0	0
1	1	1	1	0	0	0	0	0	1
1	1	0	0	1	1	0	1	1	1
0	0	0	0	0	0	0	0	0	1
1	1	1	1	0	0	1	0	0	1
1	0	1	1	0	0	0	1	1	0
1	1	1	1	0	1	0	1	1	1
1	0	1	1	1	1	1	1	0	1
0	0	0	0	0	0	0	0	0	0
1	0	0	0	0	0	0	0	0	0
0	0	0	0	1	0	0	0	0	0
1	1	1	1	0	0	1	1	0	1
1	1	1	1	0	1	1	1	1	1
1	0	1	0	0	0	1	1	1	1
1	1	1	1	0	0	1	1	0	1
1	0	0	0	1	1	0	0	0	0
0	0	0	0	0	1	0	1	0	0
1	1	1	1	0	1	1	1	1	0
0	1	0	0	0	0	0	0	0	0
1	1	0	0	0	1	0	1	1	1
1	0	0	0	1	0	0	1	1	1
1	0	0	1	1	0	1	1	1	1
1	1	1	0	0	1	0	0	0	1
1	1	0	0	1	1	0	1	1	1
1	0	0	0	1	0	0	1	0	0
1	0	0	0	1	1	0	0	0	1
1	1	1	0	1	1	0	0	1	1
1	1	0	1	1	1	0	1	1	1
0	0	1	1	0	0	1	1	0	0
1	0	1	0	0	0	0	0	0	0
1	1	1	1	0	1	1	1	1	1
1	1	0	0	1	0	1	1	0	1
1	0	1	1	0	0	1	1	0	0
1	1	1	1	0	0	1	1	1	0
1	0	0	1	1	0	1	1	0	0
1	1	0	0	1	1	0	1	1	1
1	1	1	1	0	1	0	0	0	1
1	1	1	1	0	1	1	1	1	1
1	1	0	0	0	1	0	0	1	1
0	0	1	0	0	1	0	0	0	0
1	1	0	1	1	1	1	1	1	1
1	0	0	0	1	0	0	1	1	0
0	0	1	0	0	0	0	0	0	0
1	1	0	0	1	0	1	1	0	1
1	1	1	1	0	1	1	1	1	1
0	1	0	0	0	0	0	0	0	0
1	1	1	1	0	1	0	0	0	0
1	1	1	1	0	1	0	1	0	0
1	1	1	1	0	1	0	0	0	1
1	0	0	0	0	0	0	0	0	0
0	0	0	0	0	0	0	1	1	0
1	1	1	0	0	0	0	0	0	1
1	1	0	0	0	1	1	0	1	1
1	1	1	1	1	1	1	1	1	1
1	1	1	1	0	1	1	1	1	1
1	1	0	1	1	1	1	1	1	1
1	1	0	1	1	0	1	1	0	1
1	1	0	0	1	0	0	1	0	1
1	0	0	0	1	0	0	1	0	0
0	0	1	0	0	0	0	0	0	1
1	0	0	1	1	1	0	1	0	0
0	0	0	0	1	0	1	0	0	0
1	1	0	0	1	1	0	1	1	1
1	1	0	0	1	1	0	0	1	1
1	0	1	1	0	0	0	0	0	0
1	1	1	1	0	1	1	0	0	1
1	1	1	0	1	0	0	0	0	1
1	0	1	0	0	1	0	0	0	1
0	0	1	0	0	0	0	1	0	0
1	1	1	1	0	1	0	1	0	0
1	0	0	0	1	0	0	1	1	0
1	1	0	0	1	1	0	1	1	1
0	0	0	0	1	0	0	1	0	0
1	0	0	1	1	0	0	1	1	0
0	0	0	0	1	0	0	1	0	0
1	1	0	1	1	0	1	1	1	1
1	0	0	0	1	0	0	0	0	1
1	1	0	0	0	1	0	0	0	0
1	1	0	0	1	1	0	1	1	1
1	0	1	1	0	0	1	1	0	0
1	1	0	1	1	1	1	1	1	1
1	0	0	0	1	0	0	0	0	1
1	0	0	0	1	0	1	1	0	1
1	1	1	1	0	1	1	1	1	1
1	1	1	0	0	1	1	0	0	1
0	0	0	0	0	0	0	1	0	0
1	1	0	0	0	1	0	1	1	1
1	1	0	1	1	0	1	1	0	1
1	1	0	0	0	0	0	1	0	1
0	0	1	0	0	0	0	0	0	0
1	0	0	0	0	1	0	0	0	0
1	1	1	1	0	1	1	1	0	1
1	1	1	1	0	1	1	1	0	1
1	1	0	0	0	1	0	1	1	1
1	0	0	1	0	1	0	1	0	0
1	0	0	0	1	0	0	0	0	0
1	0	0	0	1	0	0	1	0	0
1	1	0	0	1	1	0	1	0	1
1	1	1	1	0	1	1	0	0	1
0	1	1	1	0	1	1	1	0	1
0	1	1	0	0	1	0	0	0	1
1	1	1	1	0	1	1	0	1	1
1	1	1	1	1	1	1	1	1	1
1	1	1	1	0	0	1	1	1	1
1	1	0	0	1	0	1	1	0	1
1	1	1	1	0	1	0	1	1	1
1	0	1	0	0	1	0	0	0	0
1	1	1	1	1	0	1	1	0	1
0	1	1	1	0	1	0	0	0	1
1	1	1	1	0	1	1	1	0	1
1	0	1	1	0	0	1	1	0	0
1	0	0	0	1	0	1	1	0	1
1	0	0	0	0	0	0	0	0	0
1	0	0	0	1	1	0	0	1	1
1	1	1	0	0	1	1	1	0	1
0	0	0	0	0	1	0	0	0	0
0	1	0	0	0	0	0	1	0	1
1	0	0	0	1	1	0	1	1	1
1	0	1	1	0	0	1	1	0	1
0	1	1	0	0	0	0	0	0	1
1	1	1	1	1	1	1	1	0	1
0	0	0	0	0	0	0	0	0	0
0	0	0	0	0	0	0	0	0	0
1	1	1	1	0	0	0	0	0	1
1	1	1	1	0	1	1	1	1	1
1	0	0	0	1	0	0	1	1	1
1	0	0	0	1	0	0	1	0	0
1	1	1	0	1	1	1	1	1	1
1	1	1	1	0	1	1	1	1	1
1	1	1	1	0	0	1	1	1	1
0	1	1	1	0	1	0	0	0	1
1	1	1	1	1	0	1	1	0	1
1	1	0	0	0	0	0	0	1	1
1	0	0	0	1	0	0	0	0	0
1	0	0	1	1	0	1	1	0	0
1	1	1	1	0	1	1	1	0	1
1	0	1	0	1	1	0	1	1	1
1	1	1	1	0	1	0	1	0	1
1	1	0	0	1	1	0	1	1	1
1	1	1	1	0	1	0	0	0	1
1	1	1	1	0	1	0	1	1	1
1	1	0	0	1	1	0	1	0	1
1	0	1	1	0	1	0	1	1	0
1	0	0	0	1	1	0	0	0	0
1	1	0	1	1	1	1	1	1	0
1	0	0	0	1	0	0	1	1	0
1	1	1	0	0	1	0	0	0	1
1	1	1	0	0	1	1	0	0	1
1	0	0	1	1	0	1	1	0	1
1	0	0	0	1	0	0	1	1	0
0	0	0	0	0	1	0	0	0	0
1	0	0	0	1	0	1	1	0	1
1	1	0	0	1	1	0	1	1	1
1	0	0	1	1	0	0	1	1	0
0	0	0	0	0	0	0	0	0	0
1	0	0	0	1	0	0	1	0	0
1	0	0	0	1	0	0	1	0	1
1	1	0	1	1	1	0	1	1	0
1	1	1	1	0	1	0	1	1	1
1	1	0	0	1	1	0	1	1	0
1	1	1	0	0	1	1	0	1	1
1	0	0	1	0	0	1	1	0	1
1	1	1	0	0	1	0	0	1	1
1	1	1	1	0	0	1	1	0	1
1	0	0	0	1	0	0	1	1	0
1	0	0	0	0	0	0	1	0	0
1	1	0	0	1	1	0	0	0	1
0	0	0	0	0	0	0	0	1	1
1	1	0	0	0	1	0	0	0	1
1	1	0	0	1	0	1	0	0	1
1	0	1	1	1	0	1	1	0	0
0	0	0	0	0	0	0	0	0	0
1	1	1	0	1	1	1	0	1	1
1	1	0	0	1	1	0	1	1	1
1	0	0	0	1	0	0	0	0	1
1	1	1	1	0	1	1	1	1	1
1	0	0	0	1	0	1	0	0	1
1	1	0	0	1	1	0	1	1	1
1	1	1	1	1	1	1	1	0	0
1	0	0	0	1	0	1	1	1	1
0	0	0	0	0	0	0	0	0	1
1	1	0	0	1	1	0	1	1	1
1	1	0	0	0	1	0	1	1	0
1	0	0	0	1	0	1	0	0	1
1	0	0	0	1	0	0	1	0	0
1	0	0	0	0	0	1	1	1	1
1	0	0	0	1	0	0	1	0	1
1	0	0	0	1	0	0	1	0	0
0	0	0	0	0	1	0	1	1	1
1	1	0	0	0	1	0	1	1	1
1	1	0	0	0	1	0	1	1	1
1	1	1	0	0	1	0	1	1	1
0	1	0	1	0	0	0	0	0	0
1	1	1	1	1	1	0	1	1	1
1	1	1	1	0	0	1	1	1	1
1	1	0	1	1	0	0	1	1	0
1	0	0	0	1	0	1	1	0	0
1	1	0	1	0	0	1	1	1	1
1	0	0	0	0	0	0	1	0	0
1	1	1	0	0	1	0	0	0	1
1	1	1	1	1	1	0	1	1	1
1	0	0	0	1	0	1	1	0	0
0	0	0	0	0	0	0	0	0	0
1	1	0	0	1	0	1	0	0	1
1	1	1	1	0	0	1	1	0	1
1	0	1	0	1	0	1	1	0	1
1	1	0	1	0	1	0	0	1	0
1	0	0	0	0	0	0	0	0	1
1	0	0	1	1	1	0	1	0	0
1	1	0	0	0	1	0	0	0	1
1	1	0	1	1	1	0	1	0	1
1	1	0	0	1	1	0	1	1	1
1	1	0	0	1	1	0	1	1	1
1	0	0	1	1	0	0	1	0	0
1	0	1	1	0	1	0	1	0	0
0	0	0	0	0	0	0	0	0	1
0	0	0	0	0	0	0	1	0	0
1	1	0	1	1	1	0	1	1	1
1	1	1	1	1	0	1	1	0	1
1	1	1	1	0	1	0	1	1	0
1	1	1	0	0	1	0	0	0	1
1	0	0	0	1	1	0	1	0	1
1	1	0	1	1	1	1	1	1	1
1	1	1	1	0	1	1	0	0	1
1	0	0	0	1	0	0	1	0	0
1	1	1	0	1	1	0	1	1	1
0	0	1	0	0	1	0	0	0	0
1	1	1	1	0	1	0	0	1	1
1	1	1	1	0	1	1	1	0	1
1	1	1	1	0	1	0	1	0	1
1	1	1	0	1	1	0	1	1	1
1	0	0	1	1	1	0	1	0	0
1	1	0	1	0	1	0	0	0	0
1	0	1	1	1	1	1	1	1	1
1	1	0	1	1	0	1	1	1	1
1	0	0	1	1	0	1	1	0	0
1	1	1	1	0	1	0	1	1	1
1	0	0	0	1	1	0	1	1	0
0	1	0	0	0	1	0	0	0	0
1	0	0	1	1	0	1	1	0	0
1	1	0	1	1	1	1	1	0	1
0	1	0	0	0	0	0	1	0	0
1	1	1	1	0	1	1	1	0	0
1	1	0	0	1	1	0	1	0	1
1	0	1	0	0	0	1	0	0	0
1	0	0	1	0	0	0	0	0	0
1	1	1	1	0	1	0	0	0	0
0	1	1	1	0	0	0	0	1	0
0	0	0	0	0	0	0	0	0	0
1	1	1	1	1	1	1	1	1	1
1	1	0	0	0	1	0	0	0	1
1	0	0	0	1	0	1	1	1	1
1	1	1	0	0	1	1	0	0	1
1	1	0	0	1	1	0	0	1	1
0	0	0	1	0	0	1	1	0	0
0	0	0	0	0	0	0	0	0	0
1	1	1	1	0	1	1	1	1	1
1	1	0	0	0	1	0	0	1	1
0	0	1	1	0	0	0	0	0	0
1	0	0	0	1	1	0	1	1	1
1	1	1	0	0	1	0	0	0	1
1	1	1	0	1	0	0	0	0	1
0	0	0	0	0	0	0	0	0	0
0	1	1	1	0	1	0	0	1	1
0	0	1	0	0	0	0	1	0	0
1	0	0	0	1	0	1	1	0	1
1	0	0	1	0	0	0	1	0	0
1	0	1	1	1	0	0	0	0	0
1	1	1	1	0	1	1	1	1	1
1	0	1	0	1	1	1	0	0	1
1	1	1	1	1	0	1	1	1	1
0	0	0	0	0	0	0	1	0	0
1	0	1	0	1	0	1	1	0	1
0	0	0	0	0	0	0	0	0	0
0	1	0	0	0	0	0	0	0	0
1	0	0	0	1	0	0	1	1	1
1	1	0	0	1	1	1	1	1	1
1	0	0	0	1	0	1	1	0	0
1	0	1	1	0	0	1	1	0	0
1	1	0	0	1	1	0	1	1	1
1	1	0	0	1	1	0	1	1	1
1	1	0	0	0	1	0	1	1	1
1	0	0	0	1	0	0	1	0	0
1	1	1	0	1	1	1	0	0	1
1	0	0	1	1	0	1	1	0	1
1	0	0	0	1	0	0	1	0	1
1	1	0	0	0	1	1	1	1	1
1	1	1	1	0	1	1	1	0	1
0	1	1	0	0	1	0	0	0	0
1	1	1	0	0	0	1	1	1	1
0	0	0	0	0	0	0	1	0	0
0	0	0	0	0	0	0	0	0	0
1	1	1	0	1	1	1	1	0	0
1	1	0	0	1	1	0	0	0	1
0	0	0	0	0	0	0	0	0	0
1	0	0	0	1	0	0	0	0	0
1	1	0	0	1	1	0	1	1	1
1	1	0	0	1	0	0	0	1	1
1	0	1	0	0	0	1	0	0	0
1	1	0	1	1	1	0	1	1	1
1	1	1	1	0	1	1	1	1	1
1	1	0	1	1	0	1	1	0	1
1	0	0	1	0	0	1	1	0	0
0	1	1	1	0	1	0	1	1	1
1	1	1	1	0	0	1	1	0	1
1	1	1	0	0	1	0	0	1	1
1	0	0	0	1	0	0	1	0	0
1	1	1	0	1	1	0	1	1	1
1	1	1	0	0	1	0	1	0	1
1	1	1	0	0	1	0	1	1	1
1	1	1	1	0	1	0	1	1	1
1	0	0	0	1	1	0	1	0	0
1	1	0	0	1	1	0	0	1	1
1	1	0	0	1	1	0	0	1	1
1	1	1	0	0	1	0	1	1	1
1	1	0	0	1	1	0	1	1	1
1	1	1	1	0	1	1	1	1	1
1	1	1	1	1	1	0	1	1	0
1	1	1	1	0	1	1	1	1	0
1	1	1	0	0	0	1	0	0	1
0	0	0	0	0	0	0	0	0	0
1	0	0	1	1	1	0	1	1	0
1	1	1	0	0	1	1	0	0	1
1	1	1	0	1	1	0	1	0	1
1	1	1	0	0	1	0	0	1	1
1	1	1	1	0	0	1	1	0	1
0	0	0	0	0	1	0	0	1	0
1	1	1	1	0	0	1	1	0	1
1	0	0	0	0	0	0	0	0	1
1	0	0	0	1	1	0	1	1	1
1	1	0	0	1	1	0	1	1	1
0	0	0	0	0	0	0	0	0	0
1	1	1	0	0	1	0	0	1	1
0	0	1	0	0	1	0	0	0	0
1	0	0	1	1	1	0	1	1	0
1	1	0	0	0	1	0	0	1	1
1	0	0	1	0	0	0	0	0	0
1	0	0	1	1	0	1	1	0	0
1	0	0	0	1	0	0	1	0	0
1	0	1	1	1	1	1	1	0	1
1	1	1	1	1	1	1	1	1	1
1	1	0	1	0	1	0	1	1	1
1	1	1	0	0	1	0	1	1	1
1	1	1	0	0	0	1	0	0	1
0	1	0	0	0	1	0	1	0	1
1	1	0	1	1	0	1	1	0	1
1	1	0	0	0	1	0	1	1	1
1	0	1	1	1	0	1	1	0	0
1	1	0	1	0	0	1	1	1	1
1	0	0	1	1	0	0	1	0	1
1	1	1	1	1	1	1	1	1	1
1	1	0	0	1	1	0	0	0	1
0	1	0	0	0	0	0	1	0	1
0	1	0	0	0	0	0	0	0	0
0	0	0	0	1	1	0	0	1	0
1	1	0	1	1	1	1	1	1	1
1	1	1	0	1	1	1	0	0	1
1	1	1	0	1	0	0	1	1	1
1	0	1	0	0	1	0	0	1	1
0	0	0	0	0	0	0	0	0	0
0	1	0	0	0	0	0	0	0	1
1	1	1	1	0	1	1	0	0	1
1	0	1	0	0	0	1	1	0	1
0	0	0	0	0	0	0	0	0	0
1	1	0	1	1	1	1	1	1	1
1	1	1	0	0	1	0	1	1	1
1	1	1	1	0	0	1	1	0	1
0	1	1	1	0	1	0	0	1	1
1	1	0	1	1	0	1	1	1	1
1	1	1	1	0	0	1	1	0	1
1	1	0	0	0	1	0	0	0	1
1	1	1	1	1	1	1	1	1	1
1	1	1	1	0	1	1	1	0	1
0	1	0	0	0	1	0	0	0	0
1	0	0	0	1	1	0	1	1	1
1	0	0	1	1	1	0	1	1	0
0	0	0	0	0	0	0	0	0	0
1	0	1	0	0	0	1	0	0	1
1	1	0	0	1	0	0	1	1	1
1	1	0	1	0	1	1	1	1	1
1	1	1	1	0	0	0	0	0	1
1	0	0	0	1	0	0	1	1	0
1	1	1	0	0	1	0	0	0	1
1	1	0	1	1	1	0	1	1	1
1	1	0	0	1	1	0	1	1	1
1	0	0	1	1	1	1	1	1	0
1	1	0	1	1	1	1	1	1	1
1	1	1	1	1	0	1	1	0	1
1	1	0	0	1	0	0	1	1	1
1	1	1	1	0	0	0	1	0	0
1	0	0	0	1	0	1	0	0	0
1	1	0	1	1	1	0	1	1	1
1	1	1	0	0	1	0	1	0	1
1	1	1	1	0	1	0	0	1	0
1	0	1	1	1	1	0	1	0	0
0	0	1	0	0	0	0	1	0	0
1	0	0	0	1	0	1	1	0	1
0	1	1	0	0	0	0	1	0	0
1	1	0	1	1	0	0	0	1	1
1	0	0	0	1	0	0	1	1	1
1	0	0	0	1	0	0	1	0	0
0	0	0	0	0	0	1	1	0	1
1	0	0	0	1	1	1	1	1	1
1	1	1	1	0	0	1	1	0	1
1	1	0	0	1	1	1	1	1	1
1	1	1	0	1	1	1	1	0	1
1	1	1	1	0	1	1	1	0	1
1	0	1	0	0	1	0	1	0	0
0	0	0	0	1	0	1	1	0	0
1	1	1	0	1	0	1	1	0	1
1	1	1	1	0	0	1	1	0	1
1	1	0	1	0	0	1	1	1	1
1	1	1	0	0	1	0	1	0	1
1	0	1	1	0	1	0	1	0	1
1	0	0	0	1	0	0	1	0	0
0	0	0	0	1	0	0	0	0	0
1	1	0	1	0	0	1	1	0	1
0	0	0	0	0	0	1	1	0	0
1	0	0	1	1	1	0	1	1	0
1	0	0	0	1	0	0	0	0	0
0	0	0	0	0	0	0	1	0	0
1	1	0	0	1	0	1	1	1	1
1	1	0	0	0	1	0	1	1	1
1	0	1	0	0	0	1	1	0	1
1	1	1	1	0	1	0	0	0	1
0	0	0	0	0	0	0	1	0	0
1	0	0	0	0	1	0	1	1	1
1	0	0	1	1	0	1	1	0	1
1	1	0	0	1	1	0	1	1	1
1	1	1	0	0	1	0	0	1	1
0	0	0	0	0	0	0	0	0	0
0	0	0	0	0	1	0	1	1	0
1	0	0	0	1	0	0	1	0	1
1	0	1	1	1	0	1	1	0	0
1	0	0	0	1	0	0	0	0	0
1	1	0	0	1	1	0	1	1	1
1	1	1	1	0	1	1	0	0	1
1	1	0	0	1	1	0	1	1	1
1	1	0	0	1	1	0	1	1	1
0	0	0	0	0	0	0	1	0	0
1	1	1	0	1	1	1	0	1	1
1	1	0	0	1	1	0	1	1	1
1	0	0	1	1	0	0	1	0	0
1	0	0	1	1	0	1	1	0	1
1	0	0	0	0	0	0	0	0	0
1	1	1	1	0	1	1	0	0	1
1	1	0	0	1	0	0	1	0	1
1	1	1	1	0	1	0	1	1	1
1	0	0	0	1	0	0	1	0	1
1	0	0	0	0	0	0	1	0	0
0	0	0	0	0	0	0	0	0	0
1	1	1	1	1	1	0	1	1	1
1	1	1	0	0	0	0	1	0	1
1	1	0	1	1	1	0	1	1	1
0	0	0	0	0	0	0	1	0	0
1	0	0	0	1	0	1	1	0	1
1	1	1	0	0	1	1	1	1	1
0	1	0	0	0	0	0	1	1	1
0	0	0	0	0	0	0	0	0	0
1	1	0	0	1	1	0	1	1	1
1	1	1	0	0	0	1	1	0	1
1	0	1	1	1	0	0	1	0	0
1	1	1	1	0	1	1	1	0	1
1	1	1	1	0	1	1	1	1	0
1	1	0	1	1	1	1	1	1	1
1	1	1	0	0	1	0	0	0	1
1	1	0	0	1	1	0	1	1	1
1	0	0	0	1	1	0	1	1	0
1	0	0	1	1	1	1	1	1	1
1	0	1	0	1	0	1	0	0	0
1	0	0	0	1	0	0	1	1	1
1	1	0	0	1	1	0	1	1	1
1	0	1	0	1	1	0	1	0	1
1	0	1	1	1	0	0	1	0	1
1	0	1	1	0	0	1	0	0	0
1	1	1	1	0	1	1	0	0	1
1	0	1	0	0	1	0	0	0	1
1	0	0	0	1	1	1	1	0	0
1	1	1	1	1	1	1	1	0	1
1	1	0	0	1	1	0	1	1	1
1	0	1	1	1	0	1	1	0	1
1	0	0	0	1	1	0	1	1	1
1	0	0	0	1	0	0	1	0	0
1	0	0	0	1	0	0	0	0	0
1	1	1	0	1	1	0	0	1	1
1	0	0	0	1	0	0	1	1	0
1	1	0	0	0	0	1	1	1	1
1	0	1	1	0	0	0	0	0	0
1	1	0	0	1	1	0	1	1	1
1	1	1	0	0	1	0	0	0	1
1	0	0	0	1	1	1	1	1	0
1	0	0	0	1	1	0	1	0	0
1	1	1	0	0	1	0	1	1	1
1	1	0	0	1	1	0	1	1	1
1	1	0	1	1	1	0	1	1	1
1	0	1	0	0	1	0	0	0	1
0	0	1	0	0	0	0	0	0	0
1	1	1	1	0	0	1	0	0	1
1	1	1	1	0	1	1	1	0	1
1	0	0	1	1	0	1	0	0	1
1	0	0	0	1	1	0	1	0	0
1	0	0	0	1	1	0	1	1	0
1	1	0	0	1	1	0	1	1	1
1	1	0	0	0	0	0	0	0	0
1	1	0	0	1	1	0	1	1	1
1	1	1	0	0	1	0	0	0	1
1	0	1	1	0	0	1	1	0	0
0	0	0	0	0	0	0	0	1	0
1	0	0	0	1	1	0	0	1	0
1	1	1	0	0	1	0	1	1	1
1	1	0	0	1	1	0	1	1	1
1	1	0	0	1	1	0	0	0	1
1	1	1	1	1	0	1	1	0	1
1	0	0	0	1	0	0	0	1	0
1	1	0	1	0	0	1	1	1	1
1	1	0	0	1	1	0	0	1	1
1	1	1	0	0	0	0	1	1	1
1	1	0	0	1	1	0	1	1	1
1	1	0	0	1	1	0	1	1	1
1	1	1	0	0	1	0	1	0	1
0	0	0	0	0	0	0	0	0	0
1	0	0	0	1	0	1	0	0	0
0	0	0	0	0	0	0	0	0	0
1	1	0	1	1	1	0	1	1	1
1	0	1	0	0	1	0	0	0	0
1	0	1	0	1	1	1	1	0	1
0	1	1	0	0	1	0	0	1	1
0	0	1	0	0	0	0	0	0	1
1	1	1	0	0	1	0	0	0	1
1	1	1	1	0	0	1	1	0	1
0	0	0	0	0	0	1	0	0	0
1	0	1	0	0	0	0	0	0	0
1	0	0	0	0	0	0	1	0	0
1	1	0	1	0	1	1	1	1	1
1	1	0	1	0	1	0	1	1	1
1	1	0	0	0	1	0	0	1	1
1	0	0	0	1	1	0	1	1	1
1	1	1	1	0	1	0	1	1	0
1	1	1	1	0	0	1	1	0	1
1	0	0	0	0	1	0	0	1	0
1	1	1	1	0	1	1	1	0	1
1	0	1	1	0	0	1	1	0	1
1	0	1	1	0	1	0	0	0	0
1	1	0	0	1	0	1	1	1	1
1	1	1	1	0	1	1	0	0	1
1	1	0	1	0	0	1	1	1	1
1	1	0	0	1	1	1	0	0	1
1	0	0	0	1	0	0	0	0	0
1	1	1	1	0	1	1	1	0	1
1	1	1	1	1	1	0	1	0	0
1	1	0	0	1	1	0	1	1	1
1	1	0	0	0	1	0	0	1	1
1	0	0	0	0	0	0	0	0	0
1	1	1	0	1	1	1	1	0	1
1	0	0	0	1	0	0	0	0	1
1	0	1	0	0	1	0	0	0	0
1	1	1	0	1	1	0	0	0	1
1	1	1	1	1	0	1	1	0	1
1	1	1	1	0	1	1	1	0	1
0	0	1	0	0	0	0	0	0	0
1	1	0	0	1	1	0	1	1	1
1	1	1	0	0	0	0	0	0	0
1	1	1	0	0	1	0	0	0	0
1	0	0	0	1	1	0	1	0	0
1	1	0	0	1	1	0	1	1	1
0	0	0	0	0	0	0	0	0	1
1	1	1	1	0	1	1	1	1	1
1	0	1	0	1	0	0	0	0	0
1	1	1	0	0	1	0	1	0	1
1	0	0	0	1	1	0	0	0	0
0	1	1	0	0	0	1	0	0	1
1	1	0	0	1	1	0	1	1	1
0	0	0	0	0	0	0	0	0	0
1	0	0	0	1	1	0	0	1	1
1	1	1	1	1	0	1	1	0	1
0	1	0	0	0	1	0	1	1	1
0	1	1	0	0	1	0	0	0	1
1	1	1	1	0	1	1	0	0	1
1	1	0	0	0	1	0	1	1	1
0	1	1	0	0	1	0	0	0	0
1	1	1	1	0	1	1	0	0	1
1	1	1	1	0	1	1	1	1	1
0	0	0	0	0	0	0	0	0	0
1	1	1	1	1	0	1	0	0	1
1	0	1	0	0	1	0	1	0	0
0	0	0	0	0	0	0	0	0	0
1	1	1	1	0	1	1	1	1	1
1	1	0	0	1	1	0	1	1	1
1	1	1	0	0	1	1	1	1	1
1	1	0	0	1	1	0	0	1	1
0	0	0	0	0	0	0	1	0	0
0	0	0	0	0	0	0	0	0	0
1	1	1	0	0	1	0	1	1	1
1	1	1	1	1	0	1	1	0	1
1	1	0	0	1	1	0	1	1	1
1	0	0	1	1	0	0	1	0	0
1	1	0	0	1	1	0	1	1	1
0	0	0	0	1	0	0	1	0	0
1	1	1	0	0	1	0	1	1	1
1	0	0	0	1	0	1	1	0	1
1	0	0	0	1	0	0	1	0	0
1	1	0	1	1	0	1	1	0	1
1	1	1	0	1	1	0	1	0	1
1	1	1	0	0	1	1	0	1	1
1	1	0	1	1	0	1	1	1	1
1	1	0	0	1	1	0	0	1	1
1	1	1	0	0	1	1	0	0	1
0	0	0	0	0	0	0	0	0	0
0	0	1	0	0	0	0	0	0	0
1	1	0	0	0	1	0	1	1	1
1	1	1	0	0	0	0	0	1	1
0	0	0	0	0	0	0	0	0	0
1	0	0	0	1	0	1	0	0	1
1	0	0	0	1	1	1	1	1	1
1	1	1	1	1	0	1	1	0	1
0	1	1	1	0	1	0	1	1	0
0	1	1	0	0	1	0	0	1	1
1	1	1	1	0	0	0	0	0	1
1	1	1	1	0	1	0	0	1	1
1	1	1	1	1	0	1	1	0	1
0	1	0	1	0	0	0	1	0	1
0	1	0	0	0	1	0	0	0	0
1	1	1	1	0	1	0	1	1	1
1	1	1	0	0	1	0	0	0	1
1	0	0	1	1	0	1	1	1	0
0	1	0	0	0	0	0	0	0	0
1	0	1	0	1	0	0	0	0	1
1	1	0	0	1	1	0	1	1	1
0	0	0	1	0	0	0	1	0	0
1	0	0	0	0	1	0	1	1	0
1	1	0	0	1	1	0	1	1	1
1	1	1	1	0	1	0	1	1	1
1	0	0	1	1	1	1	1	1	0
1	0	0	0	1	0	1	1	0	0
0	1	1	0	0	0	0	0	0	0
1	1	0	1	0	1	0	1	1	1
0	1	0	0	0	0	0	0	0	0
1	1	0	0	0	1	0	0	0	1
1	0	0	1	1	1	0	0	0	0
0	0	0	0	0	0	0	0	0	0
[truncated: 19,200 more rows]
